# Supplementary material for: The SBT6.1 subtilase processes the GOLVEN1 peptide controlling cell elongation
Source: PubMed Central journal article supplement (PMC4983112; doi:10.1093/jxb/erw241), 2016-06-16
Supplement: supp_erw241_supplementary_figures_S1_S3_Tables_S1_S6.pdf [file supp_erw241_supplementary_figures_S1_S3_Tables_S1_S6.pdf]

## SUPPLEMENTARY DATA

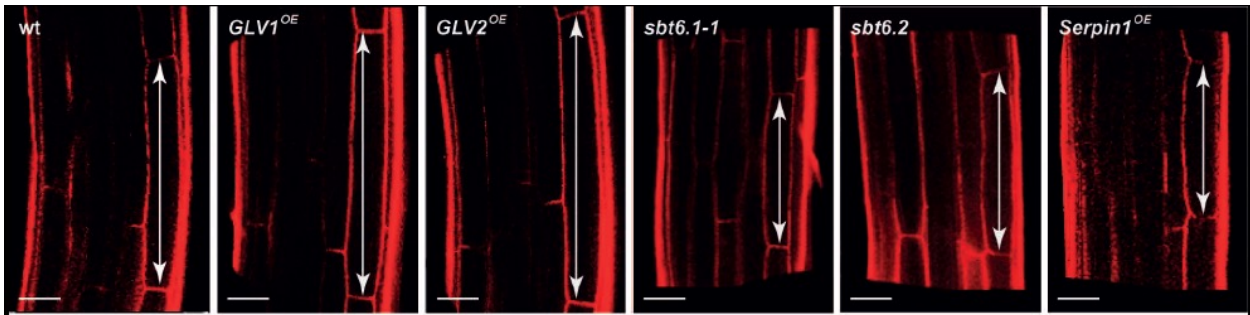

**Fig. S1.** Hypocotyl elongation phenotypes.

Comparison of hypocotyl epidermal cells. For all genotypes, the imaged cells were the most elongated in the light-grown seedlings (5 dag). Scale bars=10  $\mu$ m.

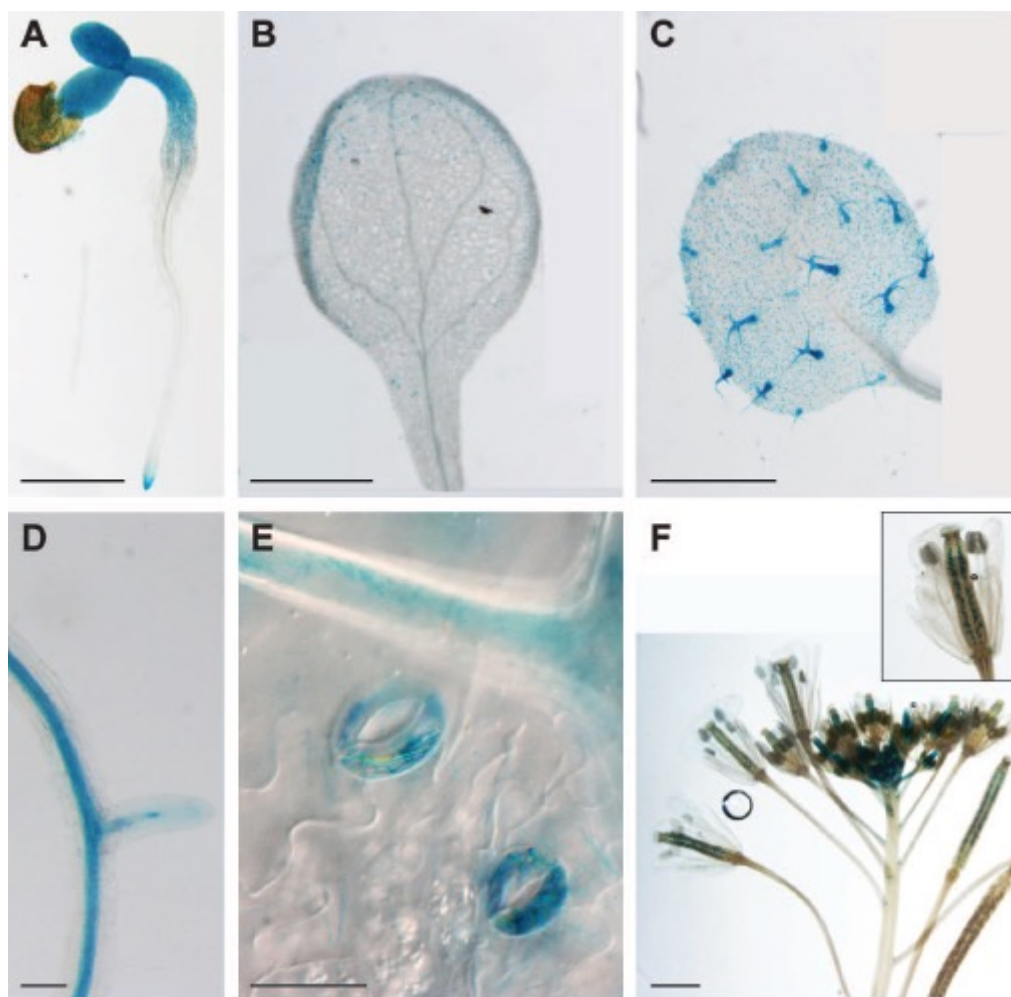

**Fig. S2.** Transcriptional activity of pSerpin1:GUS.

(A) Young seedling (3 dag). (B-F) Cotyledon and first leaves, trichomes, stomata, lateral root, and inflorescence (10 dag), respectively. Scale bars=1 mm (A-D and F), 25  $\mu$ m (E).

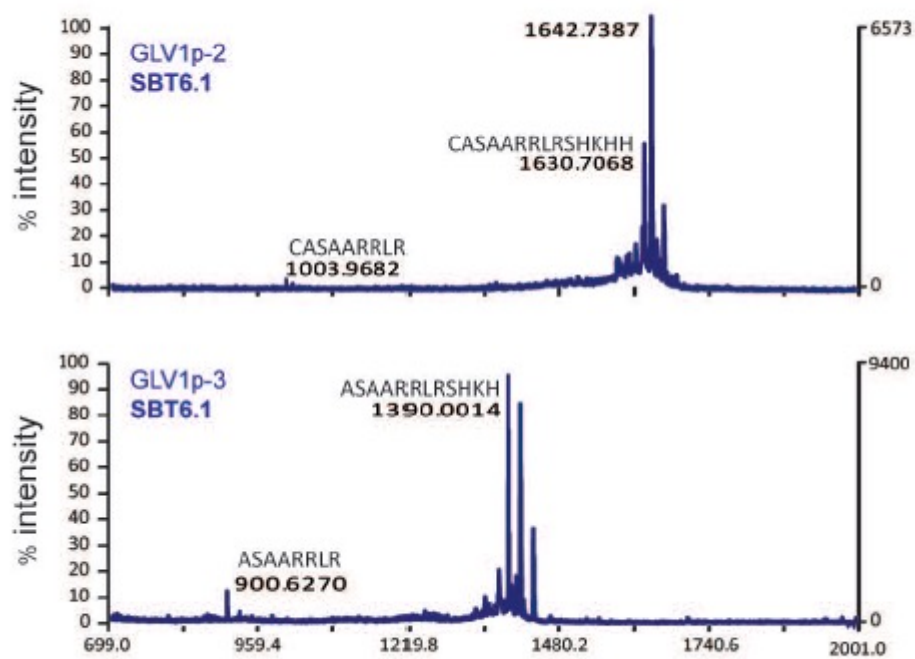

**Fig. S3.** MALDI-TOF spectra for synthetic peptides.

Synthetic GLV1-2 and GLV1-3 peptides (Table S3) and fragments after 1 h of incubation with SBT6.1.

**Table S1.** Primers used to amplify and/or confirm overexpression and knockout lines

| <b>Primer name</b> | <b>Sequence 5'–3'</b>                                  |
|--------------------|--------------------------------------------------------|
| Sbt6.1 LP          | AGCGTACGAATTGGACAAATG                                  |
| Sbt6.1 RP          | AGGACCTGAAAGCTTAGCAGC                                  |
| Sbt6.2 LP          | ATTGAGGAACTGAGCAAATGG                                  |
| Sbt6.1 RP          | AGAAGTCTGCTAGTTTCCCGC                                  |
| LBb1.3             | ATTTTGCCGATTTCCGGAAC                                   |
| GLV1 F             | ATGTATGTTGAATGTAAAAT                                   |
| GLV1 R             | AGACTTCTCGTTGTGGATCG                                   |
| 35S F              | CCACTATCCTTCGCAAGACCCTTCC                              |
| qPCR-Sbt6.1 F      | CCACCCCCGGGCAAGCATTTT                                  |
| qPCR-Sbt6.1 R      | TGCAGGGTGCCATGTTGGTGG                                  |
| qPCR-Sbt6.2 F      | TCAAGCCGGGGGCCAACATC                                   |
| qPCR-Sbt6.2 R      | CGCAATTGCCCCACAGGCAGA                                  |
| pSerpin1 F         | GGGGACAAGTTTGTACAAAAAAGCAGGCTTAGTTAGTGTACATAATATCAAATG |
| pSerpin1 R         | GGGGACCACTTTGTACAAGAAAGCTGGGTTTTTCGCCGGAGGTTGTGGTG     |
| pRRLR Fwd          | gcccgcgcccgcTCACATAAGCATCATCATCAC*                     |
| pRRLR Rev          | ggcggcggcggcAGCGGCAGAGGCACATCC*                        |
| pRRRAL Fwd         | gcccgcgcccgcggcGGTGGAGTCGAGACAGGGGAAG*                 |
| pRRRAL Rev         | ggcggcggcggcggcTTCTCCACCATTGAAGACGTC*                  |

\* Lowercase letters defines subtilases recognition motifs and uppercase letters represent flanking sequences.

**Table S2.** Subtilase (*sbt*) mutant genotypes of *Arabidopsis*

| Gene name | AGI code  | Mutant ID    | FST position | Homozygous | Heterozygous | Suppression of agravitropic root phenotype |
|-----------|-----------|--------------|--------------|------------|--------------|--------------------------------------------|
| AtSBT1.1  | At1g01900 | SALK_033704  | Exon         | +          |              | No                                         |
|           |           | SALK_017912  | Exon         | +          |              | No                                         |
| AtSBT1.2  | At1g04110 | SALK_035559  | 300-UTR-5'   | +          |              | No                                         |
| AtSBT1.3  | At5g51750 | SALK_011867  | Exon         |            | +            | No                                         |
| AtSBT1.4  | At3g14067 | SALK_054778  | Exon         | +          |              | No                                         |
|           |           | SALK_063823  | Exon         | +          |              | No                                         |
| AtSBT1.5  | At3g14240 | SALK_032651  | Exon         | +          |              | No                                         |
| AtSBT1.6  | At4g34980 | GK_270F06    | Exon         | +          |              | No                                         |
| AtSBT1.7  | At5g67360 | GK_140B02    | Exon         | +          |              | No                                         |
| AtSBT1.8  | At2g05920 | GK_168E04    | Exon         | +          |              | No                                         |
|           |           | SALK_020799  | Exon         | +          |              | No                                         |
| AtSBT1.9  | At5g67090 | SALK_009925  | Exon         |            | +            | No                                         |
|           |           | SALK_009917  | Exon         | +          |              | No                                         |
|           |           | GK_100G11    | 300-UTR-3'   | +          |              | No                                         |
| AtSBT2.1  | At1g30600 | GK_202H08    | Exon         | +          |              | No                                         |
|           |           | SALK_091134  | Exon         | +          |              | No                                         |
| AtSBT2.2  | At4g20430 | SALK_150020  | Exon         | +          |              | No                                         |
|           |           | SALK_013152  | Exon         | +          |              | No                                         |
| AtSBT2.3  | At5g44530 | GK_081A06    | Intron       | +          |              | No                                         |
|           |           | SALK_022324  | Exon         | +          |              | No                                         |
| AtSBT2.5  | At2g19170 | FLAG_181B06  | Exon         | +          |              | No                                         |
| AtSBT2.6  | At4g30020 | GK_125A08    | Exon         | +          |              | No                                         |
|           |           | SALK_068944  | Exon         | +          |              | No                                         |
| AtSBT3.1  | At4g21323 | GK_069E04    | Exon         | +          |              | No                                         |
| AtSBT3.2  | At1g32970 | SALK_001743  | 1000 p       | +          |              | No                                         |
| AtSBT3.3  | At1g32960 | SALK_086092  | Exon         | +          |              | No                                         |
|           |           | SALK_107460  | Exon         | +          |              | No                                         |
| AtSBT3.4  | At1g32950 | SALK_040245  | Exon         | +          |              | No                                         |
|           |           | SALK_058032  | Intron       | +          |              | No                                         |
| AtSBT3.5  | At1g32940 | GK_672C08    | Intron       | +          |              | No                                         |
|           |           | SAIL_400_F09 | Intron       | +          |              | No                                         |
| AtSBT3.6  | At4g10550 | SALK_104806  | Intron       | +          |              | Mild                                       |
| AtSBT3.7  | At4g10510 | SALK_081645  | Exon         | +          |              | No                                         |
| AtSBT3.8  | At4g10540 | GK_226F04    | Exon         | +          |              | No                                         |
| AtSBT3.9  | At4g10520 | SALK_048279  | Intron       | +          |              | No                                         |

|                 |                  |                    |        |   |               |
|-----------------|------------------|--------------------|--------|---|---------------|
| AtSBT3.10       | At4g10530        | SALK_014429        | Intron | + | No            |
| AtSBT3.11       | At5g11940        | SALK_067858        | Exon   | + | No            |
| AtSBT3.12       | At4g21326        | SALK_037231        | Exon   | + | Mild          |
| AtSBT3.13       | At4g21650        | SALK_082160        | Exon   | + | No            |
| AtSBT3.14       | At4g21630        | SALK_127987        | Exon   | + | No            |
| AtSBT3.15       | At4g21640        | SALK_064593        | Exon   | + | No            |
| AtSBT3.16       | At1g66210        | SALK_009433        | Exon   | + | Mild          |
|                 |                  | SALK_004741        | Exon   | + | Mild          |
| AtSBT3.17       | At1g66220        | SALK_040473        | Exon   | + | No            |
|                 |                  | SALK_070765        | Exon   | + | No            |
| AtSBT3.18       | At4g26330        | GK_360C11          | Exon   | + | No            |
| AtSBT4.1        | At2g39850        | SALK_016756        | Intron | + | No            |
|                 |                  | SALK_038521        | Exon   | + | No            |
| AtSBT4.2        | At4g15040        | SALK_024853        | Exon   | + | No            |
| AtSBT4.3        | At5g59190        | SALK_149055        | Exon   | + | No            |
|                 |                  | SALK_075909        | Exon   | + | No            |
| AtSBT4.4        | At5g59100        | SALK_016547        | 1000 p | + | No            |
| AtSBT4.5        | At3g46840        | GK_251C03          | Exon   | + | No            |
|                 |                  | SALK_078286        | Intron | + | No            |
| AtSBT4.6        | At3g46850        | SALK_091683        | 1000 p | + | No            |
| AtSBT4.7        | At5g58820        | SALK_013603        | Exon   | + | No            |
| AtSBT4.8        | At5g58830        | GT_5_112073        | Exon   | + | No            |
| AtSBT4.9        | At5g58840        | SALK_060155        | Exon   | + | No            |
| AtSBT4.10       | At5g58810        | SALK_119237        | Exon   | + | No            |
| AtSBT4.11       | At5g59130        | GK_132H10          | Exon   | + | No            |
| AtSBT4.12       | At5g59090        | GK_239B04          | Exon   | + | No            |
| AtSBT4.13       | At5g59120        | SALK_009191        | Intron | + | No            |
| AtSBT4.14       | At4g00230        | SALK_019254        | Exon   | + | No            |
| AtSBT4.15       | At5g03620        | SALK_063258        | Exon   | + | No            |
| AtSBT5.1        | At1g20150        | SALK_017993        | Exon   | + | No            |
| AtSBT5.2        | At1g20160        | SALK_012112        | Exon   | + | No            |
|                 |                  | SALK_012113        | Exon   | + | No            |
| AtSBT5.3        | At2g04160        | SALK_051293        | Intron | + | No            |
| AtSBT5.4        | At5g59810        | GK_099F02          | Exon   | + | No            |
| AtSBT5.5        | At5g45640        | SALK_107233        | Exon   | + | No            |
| AtSBT5.6        | At5g45650        | GK_074B04          | Intron | + | No            |
| <b>AtSBT6.1</b> | <b>At5g19660</b> | <b>SALK_111474</b> | Exon   | + | <b>Strong</b> |
|                 |                  | <b>SALK_020530</b> | Exon   | + | <b>Strong</b> |
| <b>AtSBT6.2</b> | <b>At4g20850</b> | <b>SALK_085776</b> | Exon   | + | <b>Strong</b> |

---

FST, flanking sequence tag; GK, GABI-Kat (<http://www.gabi-kat.de/>); SALK, <http://signal.salk.edu/cgi-bin/homozygotes.cgi>; UTR, untranslated region; 1000p: T-DNA insertion position 1000 bp upstream of promoter.

**Table S3.** *GLVI* transcript fold induction in transformed *sbt6* T-DNA mutant lines

| Genotype                                                      | Transcript ratio relative to WT |
|---------------------------------------------------------------|---------------------------------|
| WT                                                            | 1.0                             |
| <i>GLVI</i> <sup>OE</sup>                                     | 142.8                           |
| <i>GLVI</i> <sup>OE</sup> <i>sbt6.1-1</i> line 1 <sup>a</sup> | 192.4                           |
| <i>GLVI</i> <sup>OE</sup> <i>sbt6.1-1</i> line 2              | 4.7                             |
| <i>GLVI</i> <sup>OE</sup> <i>sbt6.1-1</i> line 3              | 20.8                            |
| <i>GLVI</i> <sup>OE</sup> <i>sbt6.1-1</i> line 4              | 11.6                            |
| <i>GLVI</i> <sup>OE</sup> <i>sbt6.1-1</i> line 5              | 22.9                            |
| <i>GLVI</i> <sup>OE</sup> <i>sbt6.1-1</i> line 6              | 95.2                            |
| <i>GLVI</i> <sup>OE</sup> <i>sbt6.1-1</i> line 7              | 24.7                            |
| <i>GLVI</i> <sup>OE</sup> <i>sbt6.1-1</i> line 8              | 2.6                             |
| <i>GLVI</i> <sup>OE</sup> <i>sbt6.2</i> line 1 <sup>a</sup>   | 39.3                            |
| <i>GLVI</i> <sup>OE</sup> <i>sbt6.2</i> line 2                | 17.6                            |

<sup>a</sup> Lines selected for further analysis.



**Table S4.** Propeptides and observed proteolytic products according to  $m/z$  for singly charged ions

| Propeptide | Synthetic sequences*    | Calculated $m/z$ | Detected $m/z$ | Cleaved peptides | Calculated $m/z$ | Detected $m/z$ |
|------------|-------------------------|------------------|----------------|------------------|------------------|----------------|
| RALF23     | SEIN <u>RRIL</u> ATTRYI | 1761.0242        | 1761.4808      | SEINRRIL         | 1000.5898        | 1000.8165      |
|            |                         |                  |                | ATTRYI           | 779.4522         | 779.6323       |
| GLV1-1     | NGGE <u>RRAL</u> GGVE   | 1370.7247        | 1371.0605      | NGGERRRAL        | 1028.5708        | 1028,7959      |
|            |                         |                  |                | NGGERRRA         | 915.4867         | 915.6780       |
| GLV1-2     | CASAA <u>RRLR</u> SHKHH | 1629.8615        | 1630.7068      | CASAARRLR        | 1003.5578        | 1003.9682      |
| GLV1-3     | ASAA <u>RRLR</u> SHKH   | 1389.7934        | 1390.0014      | ASAARRLR         | 900.5486         | 900.6270       |

\* Amino acids underlined correspond to reported subtilase canonical cleavage sites.

**Table S5.** Proteins identified after TAP purification with NTAP-Serpin1 expressed in *Arabidopsis* cell suspension cultures

| Characteristics <sup>a</sup>      | AT1G47710 | AT5G19660 |
|-----------------------------------|-----------|-----------|
| Description                       | Serpin1   | SBT6.1    |
| # Found/three experiments         | 03/mrt    | 02/mrt    |
| Molecular mass (kDa)              | 42.7      | 116.7     |
| Peptide count                     | 16        | 17        |
| Protein coverage (%)              | 41        | 16        |
| Protein score                     | 491       | 163       |
| Protein score expectation value   | 2.60E-45  | 1.60E-12  |
| Best Ions score                   | 108       | 43        |
| Best Ions score expectation value | 2.20E-10  | 1.30E-03  |

Peptide mass spectrometry was done with the 4800 MALDI TOF/TOF<sup>TM</sup> Proteomics analyzer (AB SCIEX) and matching proteins were identified with the search engine Mascot version 2.1 (Matrix Science) with the TAIR8 database. Known TAP background proteins were filtered out.

<sup>a</sup> Peptide count, number of peptides with unique sequences matching the selected protein; Protein coverage %, percentage of protein sequence covered by assigned peptide matches; Protein score, score calculated by the Mascot search engine for each protein and based on the probability that peptide mass matches are nonrandom events, but if equal to or greater than the Mascot® Significance Level calculated for the database search, the protein match is considered to be statistically nonrandom at the 95% confidence interval. Protein score,  $-10 \cdot \log(P)$ , where  $P$  is the probability that the observed match is a random event. Best Ions score, highest individual Ions Score for a given protein identification that is calculated by the Mascot search engine for each peptide matched from MS/MS peak lists and based on the probability that ion fragmentation matches are nonrandom events, but it is equal to or greater than the Mascot® Significance Level calculated for the database search, the peptide match is considered to be statistically nonrandom at the 95% confidence interval. Ions score,  $10 \cdot \log(P)$ , where  $P$  is the probability that the observed match is a random event.

**Table S6.** Typical subtilase target sequences in GLV peptides

| Protein | Amino acid sequence                                                                                                                                                               |
|---------|-----------------------------------------------------------------------------------------------------------------------------------------------------------------------------------|
| GLV1    | MSCSLR <b>SGL</b> VIVFCFILLLLSSNVGCASAA <b>RRLR</b> SHKHHHHKVASLDVFNNGGER <b>RRAL</b> GGVETGEEVVMDYPQP<br>HRKPPIHNEKS                                                             |
| GLV2    | MAIRVSHKSFLVALLLILFISSTQ <b>ARSLR</b> EVVRN <b>RTLL</b> VVEKSQESRKIRHEGGSDVDGLMDYNSANKKRP<br>HNR                                                                                  |
| GLV3    | MMRFTIIVIAFLLIIQSLEEEHILVYAHEGGEAGHKSLDYQGDQDSSTLHPKELFDAPRKVRFGRTRAEKEQVTA<br>MNNDWSFKISGEHKQTNILADHDTTKNTFCKKMMIIVNDLTSLPTLEPSTSTNDMEKLA <b>RLLR</b> DDYPIYSKPRR<br>PPVNNRAPDKF |
| GLV4    | MEMKKWSYANLITLALLFLFFIILLLAFQGGSRDDDHQHVHVAIRTKDISMGRKCLKSLKPINPTKKNGFEPDQGS<br>HDVQEREVYVELRDYGRKYKPPVHN                                                                         |
| GLV6    | MKLI <b>RVTL</b> FLCALAILLVTPSSLQLKHPYSSPSQGLSKKIVTKMAT <b>RKLM</b> IISSEYVMTSTSHESSEQLRVTS<br>SGKSKDEEKKLSEEEEEKKALAKYLSMDYRTFRRRRPVHNKALPLDP                                    |
| GLV7    | MTTSLKILCVLIILLLCFS <b>FRYSL</b> HEDGNQSSRDFVSTAKAIKYGDVMKMMIR <b>RKLM</b> MASGEKEEAETKMKRGN<br>RETERNSSKSVEEDGLVAYTADYWRAKHHPKNN                                                 |
| GLV8    | MKKWSYAKLMTSALLLVFLSIILLAFHGGSRGDNHLYDHVAIGTKDILM <b>GRKLR</b> DLKPKTESLKMINPKKNGFEY<br>SDQVSSDLRQEVFVDMARDYQGPKPRSKPLKNN                                                         |
| GLV9    | MKKTSLKMLTLVLGFCFVIYLLQGPRGGSRNGDLLI <b>ARKLI</b> SLEPIETKNA <b>ARSLK</b> DSISTDLEEEVDRLMEHEYP<br>SPVKPRKRTPVHNGVNRH                                                              |
| GLV10   | MSSIHVASMILLFLFLHHS <b>DRHL</b> DNVHITAS <b>RFSLV</b> KDQNVVSSSTSKEPVKVSFVPGPLKHHHR <b>RPPL</b> L<br>FADYPKPSTRPPRH                                                               |
| GLV11   | MVSIRVICYLLVFSVLQVHAKVSNANFNSQAPQMKNSEGLGASNGTQIAKKHAEDVIEN <b>RKTL</b> KHVNVKVEANEKN<br>GLEIESKEMVKKRKNKKRLTKTESLTADYSNPGHPPRH                                                   |

Typical subtilase target sequences are presented in red.
